# Supplementary material for: Hydroxyapatite-containing gelatin/chitosan microspheres for controlled release of lysozyme and enhanced cytocompatibility
Source: Royal Society of Chemistry journal article supplement (doi:10.1039/c3tb21553a), 2013-12-19
Supplement: c3tb21553a.pdf [file c3tb21553a.pdf]

## Supplementary Information

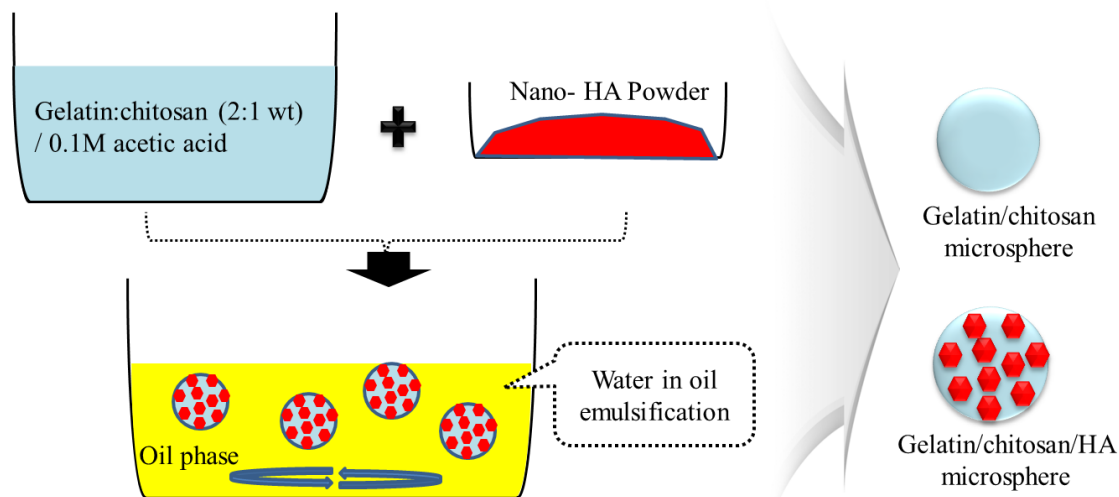

Figure S1. Schematic illustration of water in oil (W/O) emulsification to prepare HA-containing composite microspheres.

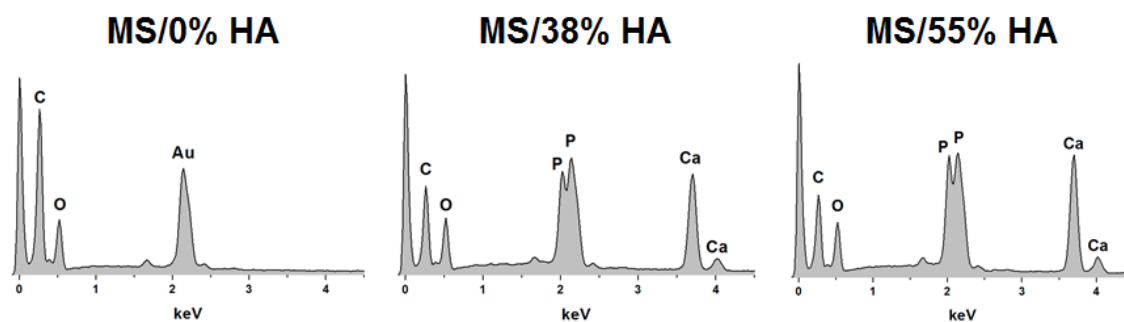

Figure S2. Energy dispersive spectroscopy (EDS) analysis of composite microspheres (MS): gelatin/chitosan microspheres with no hydroxyapatite (HA) (MS/0% HA), microspheres with 38 % HA (MS/38 % HA), and microspheres with 55 % HA (MS/55 % HA). The peaks for calcium (Ca) and phosphate (P) were clearly detected in the HA-containing microspheres (MS/38 % HA and MS/55 % HA) whereas no Ca and P peaks were observed in microspheres containing no HA (MS/0 % HA).

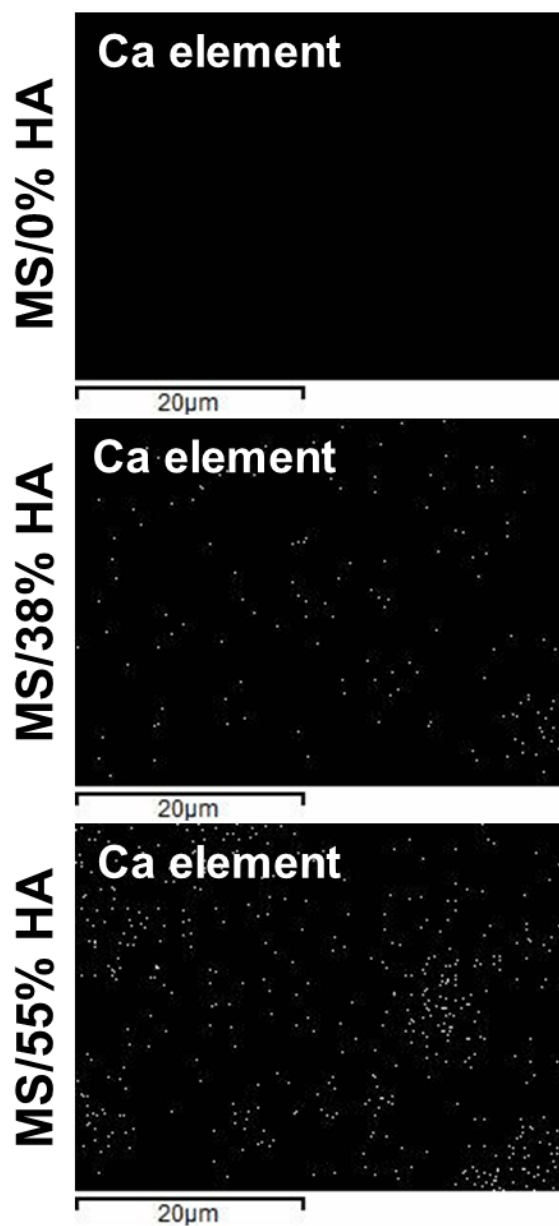

Figure S3. EDS mapping of calcium element in composite microspheres: gelatin/chitosan microspheres with no hydroxyapatite (HA) (MS/0% HA), microspheres with 38 % HA (MS/38 % HA), and microspheres with 55 % HA (MS/55 % HA).

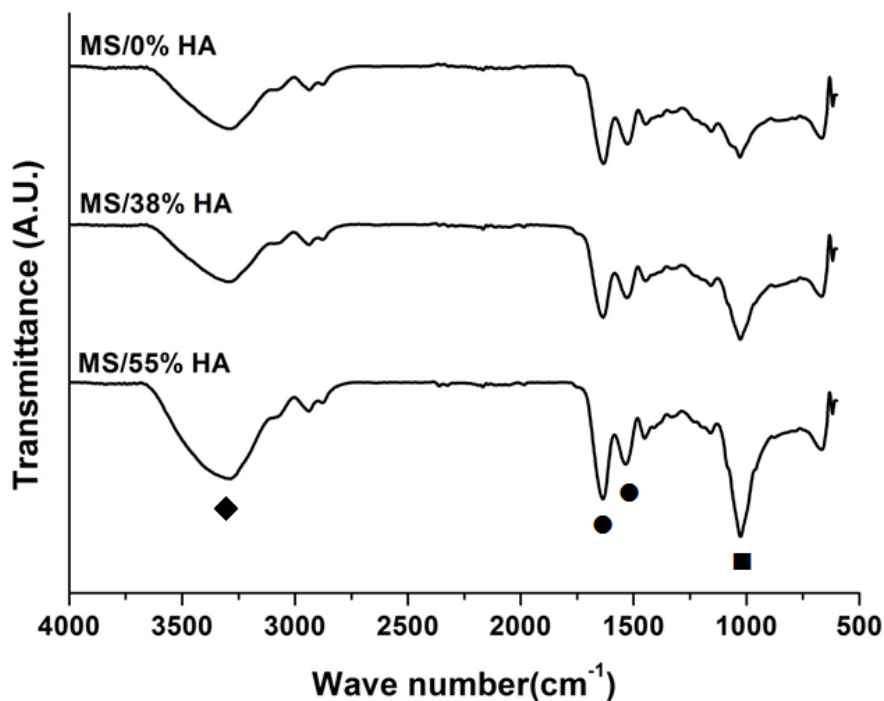

Figure S4. Fourier transform infrared (FT-IR) spectra of composite microspheres (MS): gelatin/chitosan microspheres with no hydroxyapatite (HA) (MS/0% HA), microspheres with 38 % HA (MS/38 % HA), and microspheres with 55 % HA (MS/55 % HA). The representative peaks for amide I and II (circle: ●), hydroxyl group (diamond: ◆), and phosphate (square: ■) are marked in the figure. Although the peaks at  $1026\text{ cm}^{-1}$  assigned for phosphate overlap with the peaks at  $1070\text{ cm}^{-1}$  corresponding to C-O stretching of chitosan, the overriding effect of HA is indicated by the increasing peak intensity of phosphate in HA-containing microspheres (MS/38 % HA and MS/55 % HA). The broad hydroxyl (-OH) band located at  $3571\text{ cm}^{-1}$  became more amplified especially for the composite microspheres consisting of 55 % HA (MS/55 % HA) as these had the largest amount of HA.

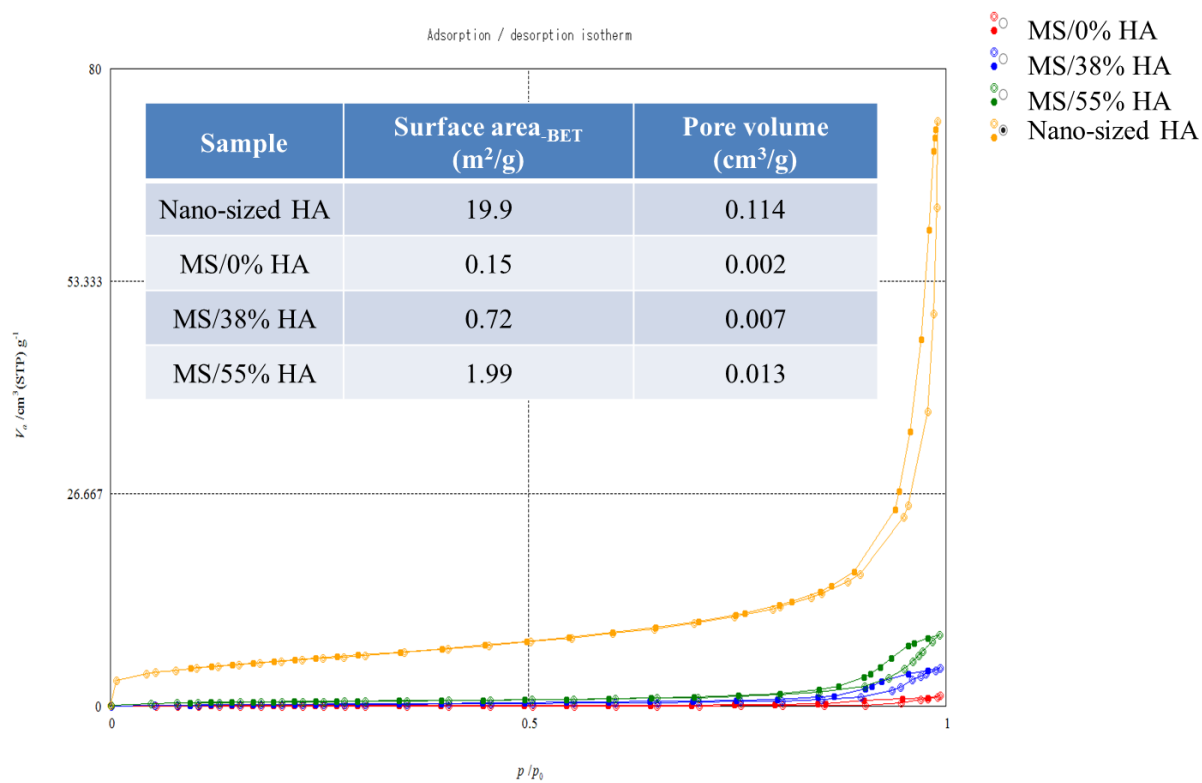

Figure S5. N<sub>2</sub> adsorption-desorption isotherms of composite microspheres and calculated specific surface area (m<sup>2</sup>/g) and pore volume (cm<sup>3</sup>/g).
